# Supplementary material
Source: PubMed Central journal article supplement (PMC6422097)
Supplement: supp_RA118.006996_142366_0_supp_245317_pj7wlb.pdf [file supp_RA118.006996_142366_0_supp_245317_pj7wlb.pdf]

**Supplementary Table 1. Amino acid positions and mutations identified from the screen.**

| amino acid positions identified from residue map stage | wild-type sequence | target mutation stage | target checking stage |
|--------------------------------------------------------|--------------------|-----------------------|-----------------------|
| 3                                                      | Y                  | -                     | -                     |
| 18                                                     | T                  | -                     | -                     |
| 19                                                     | N                  | -                     | -                     |
| 47                                                     | G                  | -                     | -                     |
| 60                                                     | A                  | -                     | -                     |
| 62                                                     | F                  | -                     | -                     |
| 71                                                     | A                  | S                     | S                     |
| 74                                                     | T                  | -                     | -                     |
| 75                                                     | W                  | -                     | -                     |
| 77                                                     | S                  | -                     | -                     |
| 84                                                     | I                  | LV                    | LV                    |
| 88                                                     | A                  | LSTV                  | not found             |
| 90                                                     | E                  | ADFNPQT               | ADNPQ                 |
| 91                                                     | M                  | FILST                 | FL                    |
| 93                                                     | K                  | -                     | -                     |
| 94                                                     | V                  | LT                    | L                     |
| 95                                                     | I                  | -                     | -                     |
| 98                                                     | F                  | AMRV                  | MV                    |
| 99                                                     | F                  | AEMRTV                | AERTV                 |
| 100                                                    | F                  | not found             | -                     |
| 102                                                    | F                  | GLNPST                | LNPST                 |
| 103                                                    | K                  | AGHIPRTW              | GPTW                  |
| 111                                                    | A                  | CGHLS                 | CGLS                  |
| 112                                                    | T                  | DGNPRSW               | GNS                   |
| 114                                                    | H                  | AGV                   | GV                    |
| 115                                                    | R                  | PS                    | PS                    |
| 117                                                    | Q                  | LPY                   | LPY                   |
| 123                                                    | E                  | A                     | A                     |
| 132                                                    | L                  | ACG                   | C                     |
| 133                                                    | I                  | CLP                   | not found             |
| 134                                                    | H                  | KR                    | KR                    |
| 136                                                    | S                  | -                     | -                     |
| 151                                                    | G                  | -                     | -                     |
| 173                                                    | V                  | -                     | -                     |
| 181                                                    | G                  | -                     | -                     |
| 185                                                    | G                  | -                     | -                     |
| 187                                                    | N                  | not found             | -                     |

|     |   |                 |           |
|-----|---|-----------------|-----------|
| 188 | T | L V             | L         |
| 202 | T | A L R S         | not found |
| 205 | K | A E P Q R S T V | A V       |
| 206 | G | not found       | -         |
| 210 | Q | L V             | L V       |
| 214 | G | -               | -         |
| 246 | T | -               | -         |
| 250 | T | I Q             | I Q       |
| 251 | I | -               | -         |
| 269 | V | -               | -         |
| 272 | H | -               | -         |
| 273 | E | -               | -         |

In order to prioritize residues to screen, we selected amino acid positions from the residue map stage with the highest improvement (A88, E90, M91, F98, F99, F102, K103, T112, H114, R115, Q117, H134, N187, T188, T202, K205, G206, Q210, T250; normalized mean > 1.5 from **Supp. Fig. 1b**) as well as those that were near the 1.5-fold changed residues (A71, I84, V94, F100, A111, E123, L132) to screen for target mutations. ‘-’ indicates that the amino acid position has not been selected according to this criteria. ‘not found’ indicates amino acid positions that have been screened but mutations with statistically significant improvement have not been identified.

**Supplementary Table 2. Layout of site-saturation libraries screened in the residue map stage.**

|           |           |           |           |     |            |
|-----------|-----------|-----------|-----------|-----|------------|
| Empty     |           |           |           |     |            |
| Water     |           |           |           |     |            |
| Wild-type | Library 1 | Library 2 | Library 3 | ... | Library 11 |
| Wild-type | Library 1 | Library 2 | Library 3 |     | Library 11 |
| Wild-type | Library 1 | Library 2 | Library 3 |     | Library 11 |
| Wild-type | Library 1 | Library 2 | Library 3 |     | Library 11 |
| Water     |           |           |           |     |            |
| Empty     |           |           |           |     |            |

**Supplementary Table 3. Layout of mutants screened in the target mutation stage.**

|       |           |           |           |     |           |           |           |       |       |
|-------|-----------|-----------|-----------|-----|-----------|-----------|-----------|-------|-------|
| Water | Water     |           |           |     |           |           |           | Water | Empty |
|       | Wild-type | Mutant 1  | Mutant 2  |     | Mutant 6  | Mutant 7  | Mutant 8  |       |       |
|       | Mutant 8  | Mutant 7  | Mutant 6  | ... | Mutant 2  | Mutant 1  | Wild-type |       |       |
|       | Wild-type | Mutant 9  | Mutant 10 |     | Mutant 14 | Mutant 15 | Mutant 16 |       |       |
|       | Mutant 16 | Mutant 15 | Mutant 14 | ... | Mutant 10 | Mutant 9  | Wild-type |       |       |
|       | Wild-type | Mutant 17 | Mutant 18 |     | Mutant 22 | Mutant 23 | Mutant 24 |       |       |
|       | Mutant 24 | Mutant 23 | Mutant 22 | ... | Mutant 18 | Mutant 17 | Wild-type |       |       |
|       | Water     |           |           |     |           |           |           |       |       |

**Supplementary Table 4. Layout of mutants screened in the target checking stage.**

|       |           |          |          |     |          |          |           |       |       |
|-------|-----------|----------|----------|-----|----------|----------|-----------|-------|-------|
| Water | Water     |          |          |     |          |          |           | Water | Empty |
|       | Wild-type | Mutant 1 | Mutant 2 |     | Mutant 6 | Mutant 7 | Mutant 8  |       |       |
|       | Mutant 8  | Mutant 7 | Mutant 6 | ... | Mutant 2 | Mutant 1 | Wild-type |       |       |
|       | Wild-type | Mutant 1 | Mutant 2 |     | Mutant 6 | Mutant 7 | Mutant 8  |       |       |
|       | Mutant 8  | Mutant 7 | Mutant 6 | ... | Mutant 2 | Mutant 1 | Wild-type |       |       |
|       | Water     |          |          |     |          |          |           |       |       |
|       | Empty     |          |          |     |          |          |           |       |       |
|       | Empty     |          |          |     |          |          |           |       |       |

**Supplementary Table 5. Composition of intracellular and extracellular solutions used to assess the ion selectivity of channelrhodopsins.**

| Solution                | [Na] (mM) | [K] (mM) | [Ca] (mM) | [H] (mM) | pH   | Other (mM)                                         |
|-------------------------|-----------|----------|-----------|----------|------|----------------------------------------------------|
| Intracellular           | 0         | 140      | 0         | 5.10E-05 | 7.40 | 5 EGTA, 2 MgCl <sub>2</sub> , 10 HEPES             |
| 145 mM NaCl             | 145       | 5        | 1         | 5.10E-05 | 7.40 | 10 HEPES, 5 glucose, 2 MgCl <sub>2</sub>           |
| 145 mM KCl              | 0         | 145      | 1         | 5.10E-05 | 7.40 | 10 HEPES, 5 glucose, 2 MgCl <sub>2</sub>           |
| 90 mM CaCl <sub>2</sub> | 0         | 5        | 90        | 5.10E-05 | 7.40 | 10 HEPES, 5 glucose, 2 MgCl <sub>2</sub>           |
| 135 mM NMDG             | 5         | 5        | 1         | 5.10E-04 | 6.40 | 135 NMDG, 10 HEPES, 5 glucose, 2 MgCl <sub>2</sub> |
